# Supplementary material for: Effect of Different Initial Fermentation pH on Exopolysaccharides Produced by Pseudoalteromonas agarivorans Hao 2018 and Identification of Key Genes Involved in Exopolysaccharide Synthesis via Transcriptome Analysis
Source: MDPI journal article supplement (doi:10.3390/md20020089), 2022-01-20
Supplement: s1 [file s1]

# Effect of Different Initial Fermentation pH on Exopolysaccharides Produced by *Pseudoalteromonas agarivorans* Hao 2018 and Identification of Key Genes Involved in Exopolysaccharide Synthesis via Transcriptome Analysis

Yuhao Ju <sup>1</sup>, Kai Shan <sup>1</sup>, Wenlin Liu <sup>1</sup>, Chenxiang Xi <sup>1</sup>, Yiling Zhang <sup>1</sup>, Wei Wang <sup>1</sup>, Chunlei Wang <sup>1</sup>, Ruiwen Cao <sup>1</sup>, Wenxing Zhu <sup>1</sup>, Haiyong Wang <sup>1</sup>, Yanqiu Zhao <sup>1</sup> and Lujiang Hao <sup>1,2,\*</sup>

<sup>1</sup> School of Bioengineering, Qilu University of Technology (Shandong Academy of Sciences), Jinan 250353, China; 10431201111@stu.qlu.edu.cn (Y.J.); kai\_shan@163.com (K.S.); 1043118323@stu.qlu.edu.cn (W.L.); 1043119587@stu.qlu.edu.cn (C.X.); 10431200980@stu.qlu.edu.cn (Y.Zhang); 10431211258@stu.qlu.edu.cn (W.W.); chunlei\_wang79@163.com (C.W.); rwcao@qlu.edu.cn (R.C.); wenxingzhu@qlu.edu.cn (W.Z.); wangchemical@126.com (H.W.); 10431211120@stu.qlu.edu.cn (Y.Zhao)

<sup>2</sup> State Key Laboratory of Biobased Material and Green Papermaking, Qilu University of Technology (Shandong Academy of Sciences), Jinan 250353, China

\* Correspondence: lujiang\_hao@qlu.edu.cn

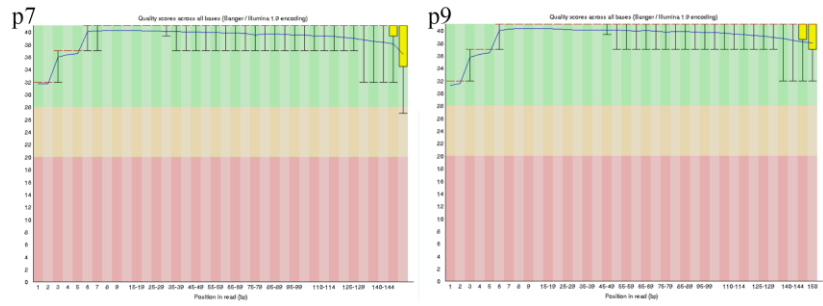

**Figure S1.** Single base mass distribution chart.

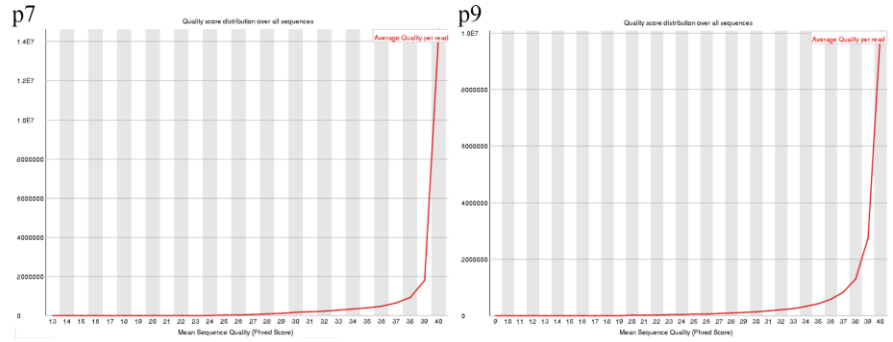

**Figure S2.** Reads average mass distribution (partial).

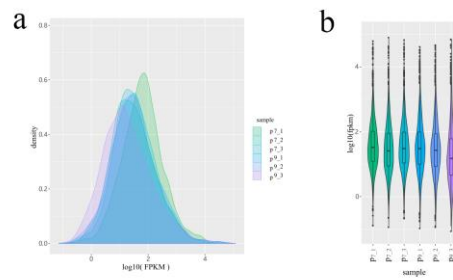

**Figure S3.** FPKM density distribution and density distribution statistics: (a) FPKM density distribution, (b) FPKM density distribution statistical.

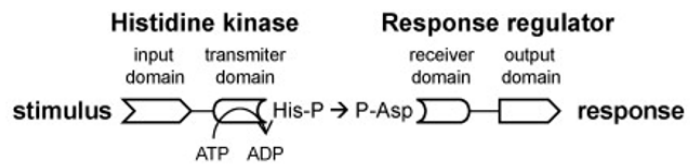

**Figure S4.** Regulatory mechanism of the two-component system.

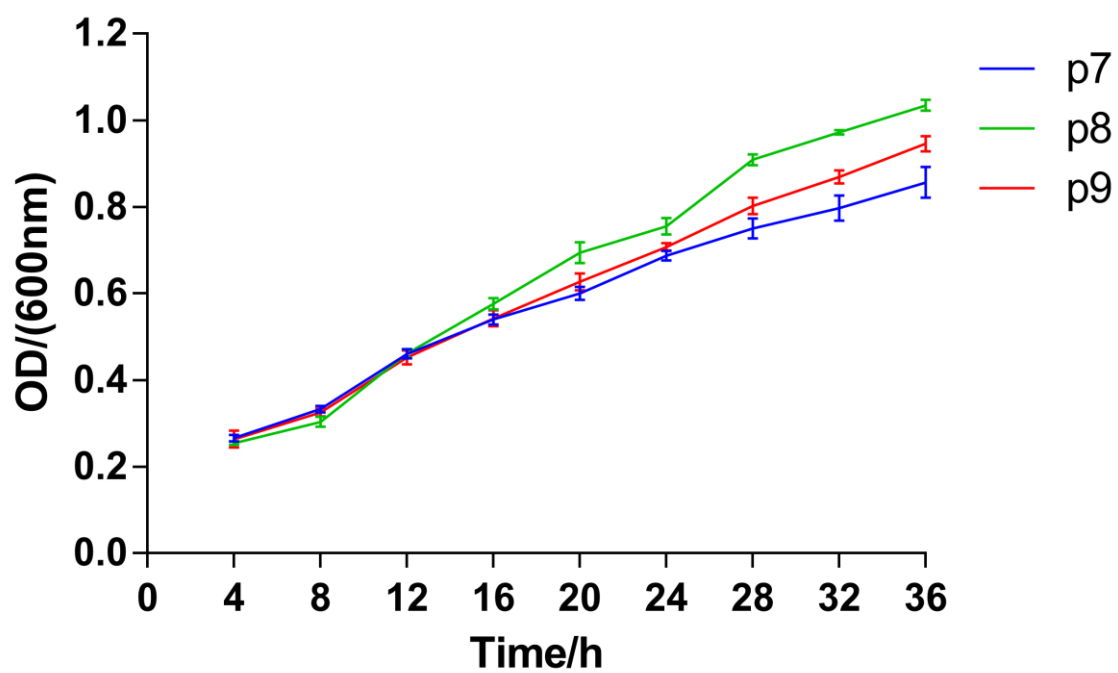

**Figure S5.** The growth curves of *P. agarivorans* Hao 2018 under different initial fermentation pH conditions.

**Table S1.** Culture conditions of *P. agarivorans* Hao 2018

| Environmental Factors   | Level |
|-------------------------|-------|
| Fermentation initial pH | 7     |
|                         | 8     |
|                         | 9     |

**Table S2.** Results of GO enrichment analysis

| GO : ID    | Term                                                | Category | DEG |
|------------|-----------------------------------------------------|----------|-----|
| GO:0060089 | molecular transducer activity                       | MF       | 118 |
| GO:0004872 | receptor activity                                   | MF       | 84  |
| GO:0004871 | signal transducer activity                          | MF       | 88  |
| GO:0007165 | signal transduction                                 | BP       | 91  |
| GO:0023052 | signaling                                           | BP       | 91  |
| GO:0007154 | cell communication                                  | BP       | 95  |
| GO:0007049 | cell cycle                                          | BP       | 25  |
| GO:1901293 | nucleoside phosphate biosynthetic process           | BP       | 72  |
| GO:0009165 | nucleotide biosynthetic process                     | BP       | 71  |
| GO:0000156 | phosphorelay response regulator activity            | MF       | 62  |
| GO:0090407 | organophosphate biosynthetic process                | BP       | 91  |
| GO:0016881 | acid-amino acid ligase activity                     | MF       | 11  |
| GO:0000160 | phosphorelay signal transduction system             | BP       | 72  |
| GO:0018130 | heterocycle biosynthetic process                    | BP       | 203 |
| GO:0035556 | intracellular signal transduction                   | BP       | 77  |
| GO:0034654 | nucleobase-containing compound biosynthetic process | BP       | 168 |
| GO:0019438 | aromatic compound biosynthetic process              | BP       | 195 |
| GO:0038023 | signaling receptor activity                         | MF       | 54  |
| GO:0040011 | locomotion                                          | BP       | 29  |
| GO:0009279 | cell outer membrane                                 | CC       | 46  |

**Table S3.** Expression of EPS transporter-related genes

| Annotation                        | Gene ID   | p7_FPKM | p9_FPKM |
|-----------------------------------|-----------|---------|---------|
| glucose/galactose MFS transporter | chr1_1825 | 5.12    | 124.45  |
| glucose/galactose MFS transporter | chr2_538  | 14.25   | 245.99  |
| Glucose transport protein         | chr1_1082 | 21.33   | 143.80  |

**Table S4.** Expression of genes related to nucleotide sugar synthesis

| Annotation                                      | Gene ID   | p7_FPKM | p9_FPKM |
|-------------------------------------------------|-----------|---------|---------|
| glucokinase                                     | chr1_1425 | 34.80   | 30.35   |
| phosphoglucomutase                              | chr1_1667 | 405.09  | 99.66   |
| dTDP-glucose 4,6-dehydratase                    | chr1_421  | 101.41  | 68.63   |
| dTDP-4-dehydrorhamnose 3,5-epimerase            | chr1_419  | 203.74  | 114.49  |
| dTDP-4-dehydrorhamnose reductase                | chr1_420  | 154.70  | 108.52  |
| UTP--glucose-1-phosphate<br>uridylyltransferase | chr1_1334 | 194.17  | 82.68   |
| UTP--glucose-1-phosphate<br>uridylyltransferase | chr1_2358 | 217.13  | 112.20  |
| UTP--glucose-1-phosphate<br>uridylyltransferase | chr1_459  | 2972.63 | 1595.51 |
| UDP-glucose 6-dehydrogenase                     | chr1_460  | 146.31  | 53.86   |
| UDP-glucuronate-epimerase                       | chr1_409  | 31.66   | 16.85   |
| phosphomannomutase                              | chr1_423  | 54.86   | 170.44  |
| mannose-1-phosphate guanylyltransferase         | chr1_422  | 59.74   | 145.72  |

**Table S5.** Expression of genes related to glycosyltransferase synthesis

| Annotation                                                             | Gene ID   | p7_FPKM | p9_FPKM |
|------------------------------------------------------------------------|-----------|---------|---------|
| glucosyl transferase family 2                                          | chr1_1341 | 9.34    | 17.94   |
| Alpha-1,4-glucan:maltose-1-phosphate<br>maltosyltransferase (Fragment) | chr1_1421 | 11.56   | 16.50   |
| glycosyltransferase                                                    | chr1_309  | 839.02  | 251.11  |
| glucosyl transferase family 2                                          | chr1_3148 | 6527.51 | 8377.47 |
| glycosyl transferase family 2                                          | chr1_406  | 14.28   | 4.33    |
| glycosyl transferase family 1                                          | chr1_440  | 36.24   | 40.54   |
| glycosyl transferase family 1                                          | chr1_444  | 44.36   | 33.16   |
| glycosyl transferase family 2                                          | chr1_446  | 27.69   | 20.22   |
| glycosyl transferase                                                   | chr1_449  | 51.19   | 23.85   |
| glycosyl transferase                                                   | chr1_450  | 46.22   | 35.30   |
| rhamnosyltransferase                                                   | chr1_451  | 11.13   | 15.61   |
| glycosyl transferase                                                   | chr1_659  | 935.43  | 1295.93 |
| glycosyl hydrolase family 16                                           | chr2_178  | 43.92   | 230.86  |
| glycosyl transferase                                                   | chr2_200  | 18.73   | 22.60   |
| glycosyl transferase                                                   | chr2_415  | 17.07   | 15.70   |
| glycosyl transferase family 25                                         | chr2_502  | 1981.20 | 209.22  |

**Table S6.** Effect of different initial fermentation pH on the yield of crude EPS

| Environmental<br>Factors | Conditions | EPS crude product yield<br>(g·L <sup>-1</sup> ) |
|--------------------------|------------|-------------------------------------------------|
| Initial pH               | 7          | 16.62±0.21                                      |
|                          | 8          | 19.34±0.16                                      |
|                          | 9          | 18.34±0.02                                      |
